# Supplementary material for: A coarse-grained xDLVO model for colloidal protein–protein interactions
Source: Royal Society of Chemistry journal article supplement (doi:10.1039/d1cp01573g), 2021-01-01
Supplement: d1cp01573g1.pdf [file d1cp01573g1.pdf]

## Supporting Information

# A coarse-grained xDLVO model for colloidal protein-protein interactions

Srdjan Pusara,<sup>a</sup> Peyman Yamin,<sup>a†</sup> Wolfgang Wenzel,<sup>a\*</sup> Marjan Krstić,<sup>a,b</sup> and Mariana Kozłowska<sup>a\*</sup>

<sup>a</sup>Institute of Nanotechnology, Karlsruhe Institute of Technology (KIT), Hermann-von-Helmholtz-Platz 1, 76344 Eggenstein-Leopoldshafen, Germany;

E-mail: mariana.kozłowska@kit.edu

<sup>b</sup>Institute of Theoretical Solid State Physics, Karlsruhe Institute of Technology (KIT), Wolfgang-Gaede-Str. 1, 76131 Karlsruhe, Germany

<sup>†</sup>The author passed away before the paper was completed

\*Corresponding author

**Table S1.** Charges of proteins at different pH obtained by protonation protocol (PROPKA/H<sup>++</sup>) in comparison with experimental values and values calculated in xDLVO.<sup>1</sup>

| <b>LYZ</b>                  |                              |                      |                     |
|-----------------------------|------------------------------|----------------------|---------------------|
| <b>pH</b>                   | <b>PROPKA</b>                | <b>Experiment</b>    | <b>xDLVO charge</b> |
| <b>3</b>                    | +14                          | +9                   | +16.18              |
| <b>4.5</b>                  | +11                          | +10                  | +10.03              |
| <b>5</b>                    | +11                          | +9 (1M KCl, pH 5.5)  | +8.77               |
| <b>7</b>                    | +9                           | +8                   | +7.73               |
| <b>8</b>                    | +8                           | +7.50                | +5.39               |
| <b>BSA</b>                  |                              |                      |                     |
| <b>pH</b>                   | <b>PROPKA/H<sup>++</sup></b> | <b>Experiment</b>    | <b>xDLVO charge</b> |
| <b>6.2</b>                  | -5                           | -13.50/-9            | -9.85               |
| <b>6.2 (H<sup>++</sup>)</b> | -8                           | -13.50/-9            | -9.85               |
| <b>7.4</b>                  | -16                          | -20.30               | -20.06              |
| <b>Subs</b>                 |                              |                      |                     |
| <b>pH</b>                   | <b>PROPKA</b>                | <b>Experiment</b>    | <b>xDLVO charge</b> |
| <b>5.5</b>                  | +6                           | n/a                  | +4.13               |
| <b>7</b>                    | +4                           | n/a                  | +3.09               |
| <b>IgG1</b>                 |                              |                      |                     |
| <b>pH</b>                   | <b>PROPKA</b>                | <b>Experiment</b>    | <b>xDLVO charge</b> |
| <b>5</b>                    | +68                          | +10.20/12/24         | +38.05              |
| <b>5.75</b>                 | +46                          | +5.10/6              | +25.83              |
| <b>6.5</b>                  | +27.38                       | +5/10.60/18.90/22.80 | +18.88              |

**a) LYZ, pH 7**

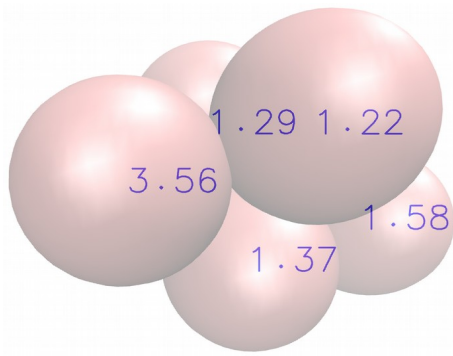

**b) Subs, pH 5.5**

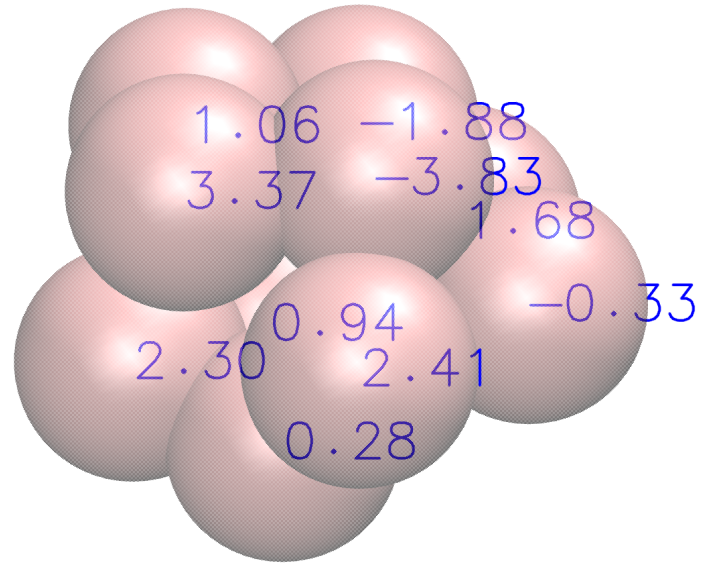

**c) BSA, pH 7.4**

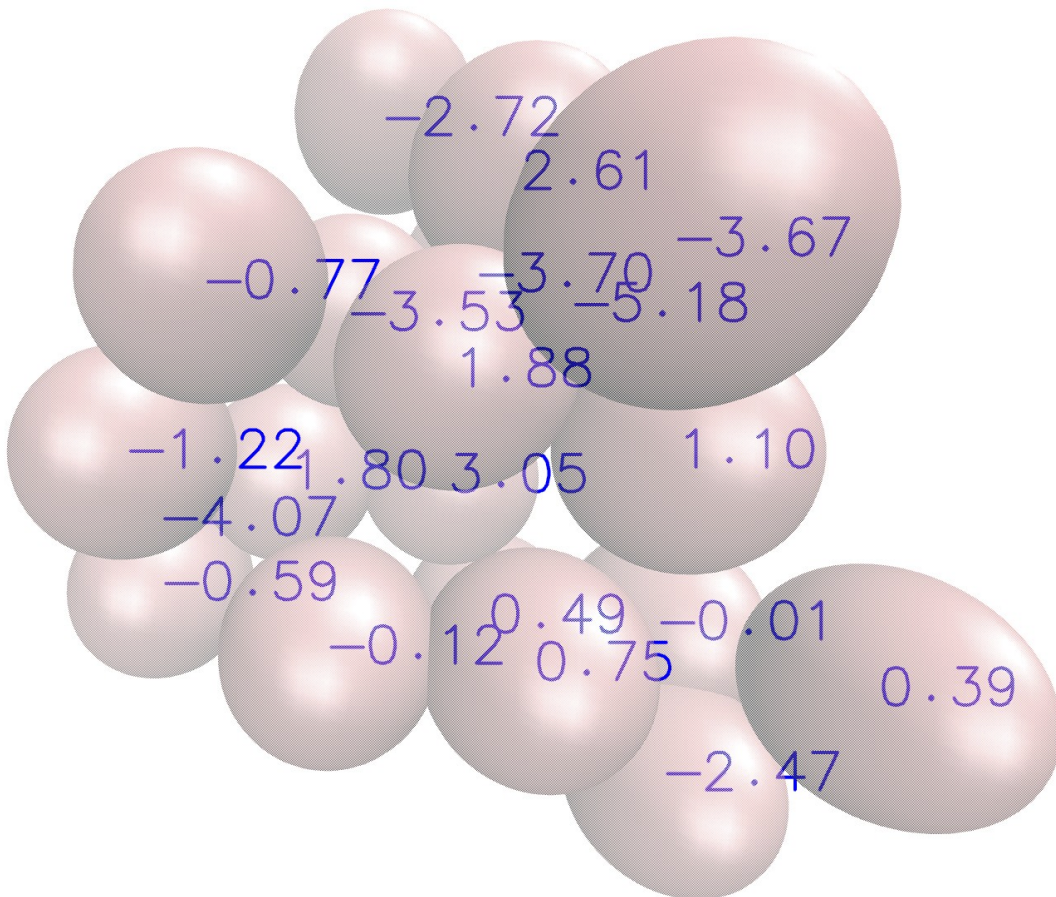

d) IgG1 pH 6.5

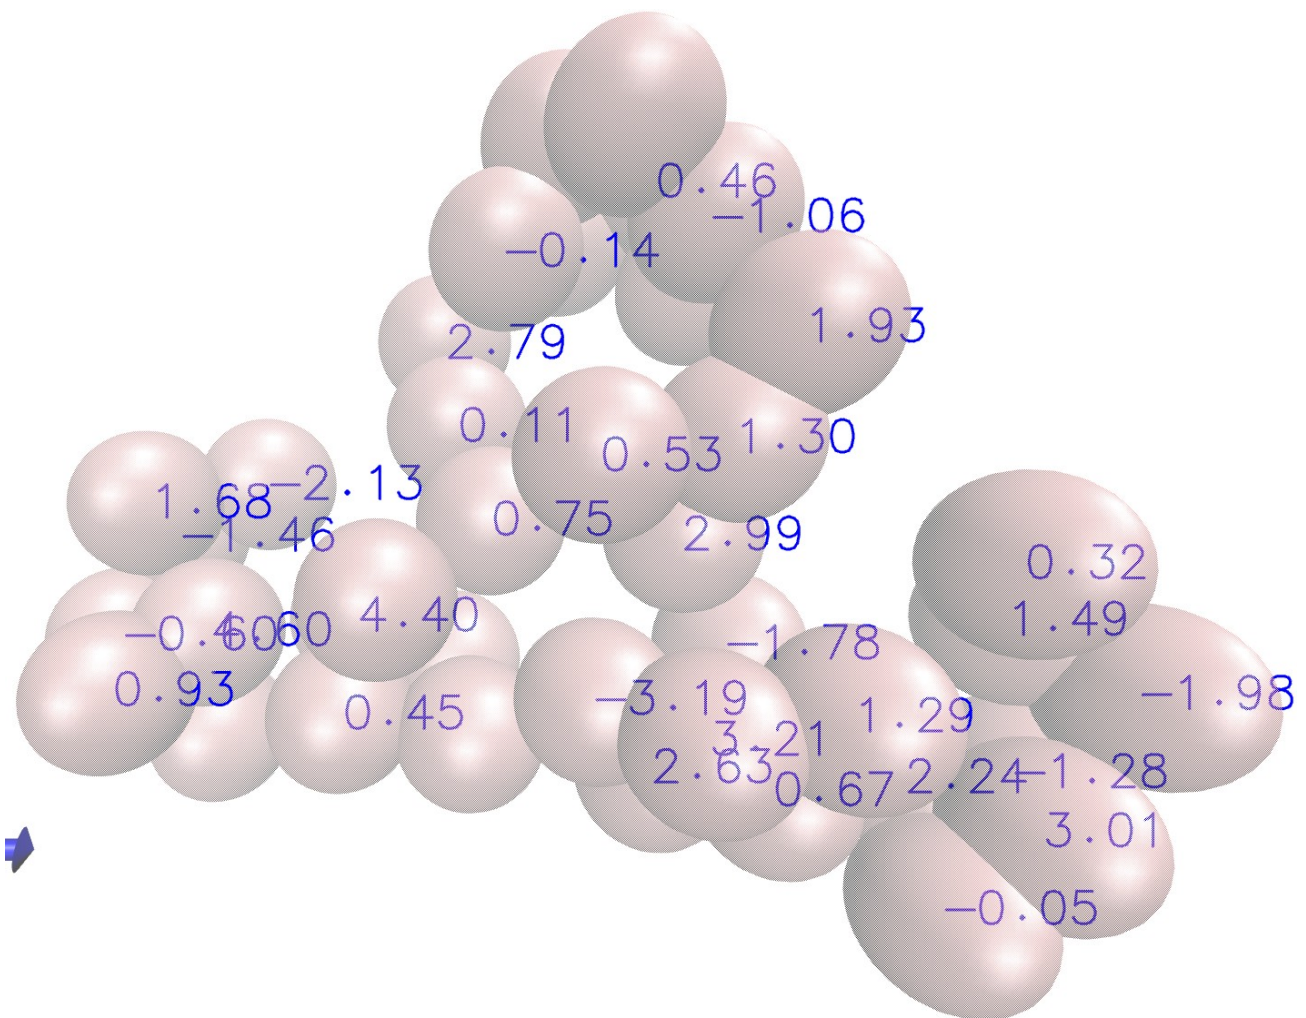

**Figure S1.** Charge distribution over coarse grained beads of four studied proteins. Partial charges of atoms included in the CG beads were obtained by using PROPKA protonation protocol.<sup>2,3</sup>

## Lysozyme, pH 7

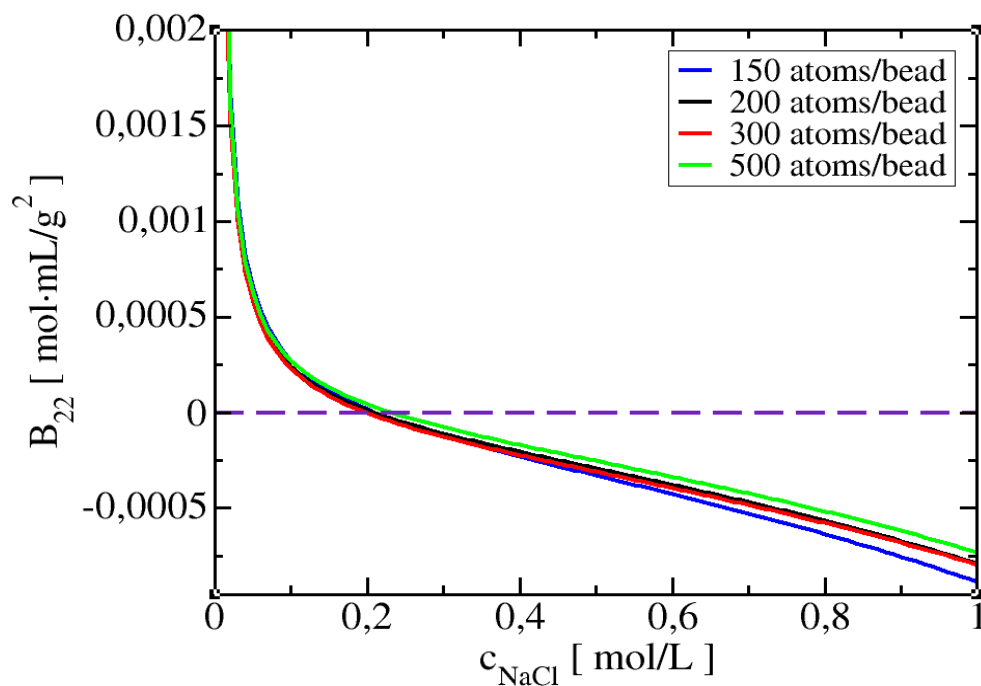

## BSA, pH 7.4 NaCl

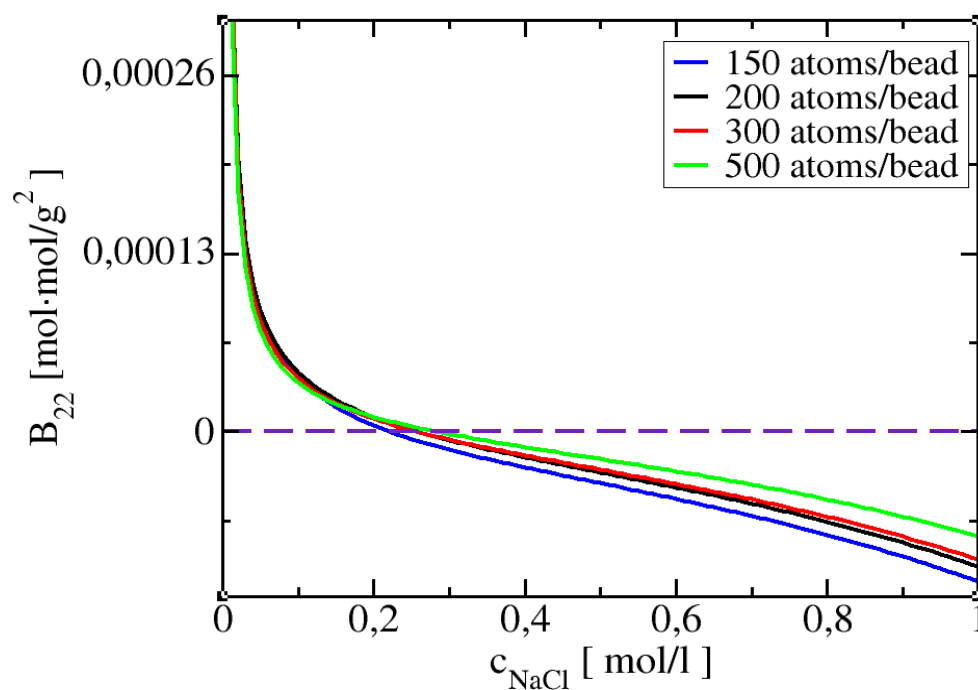

**Figure S2.** Influence of size of coarse-graining: number of atoms per CG bead, on the calculated  $B_{22}$  values for lysozyme at pH 7 and BSA at pH 7.4 in NaCl solution.

### BSA, pH 7.4 NaCl

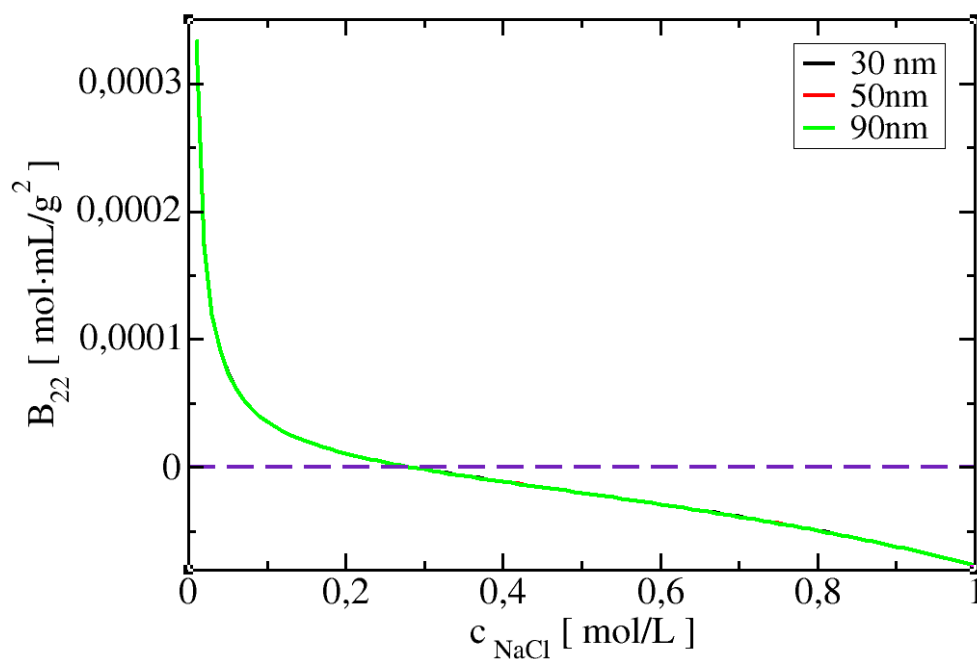

**Figure S3.** Influence of pulling distance between proteins used to calculate PMF for calculating  $B_{22}$  values of BSA at pH 7.4 in NaCl.

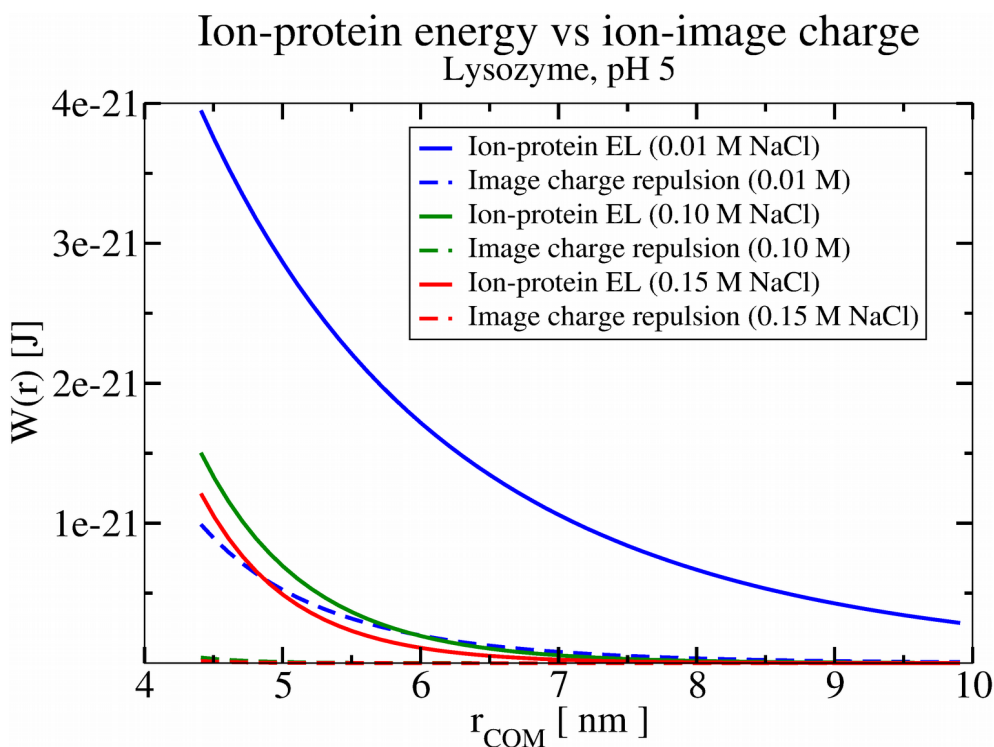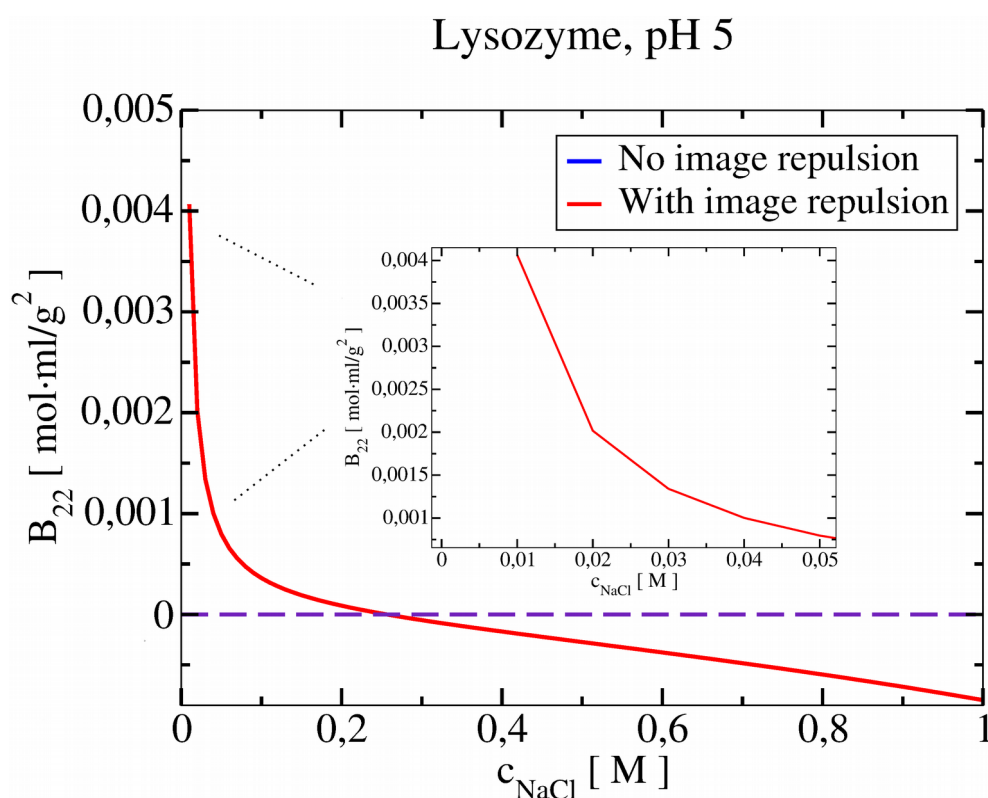

**Figure S4.** The influence of the image-based repulsion interactions between salt ions (NaCl) and proteins (LYZ at pH 5) in xDLVO-CG model (upper panel). Equations for electrostatic shielding were implemented according to Ref. 4.  $B_{22}$  of LYZ at pH 5 from PMF including image-based ion-protein repulsion interactions (lower panel). No difference is noticed after the inclusion of the image-charge-based repulsion in the protein-ion electrostatic interactions.

### Subtilisin, pH 7

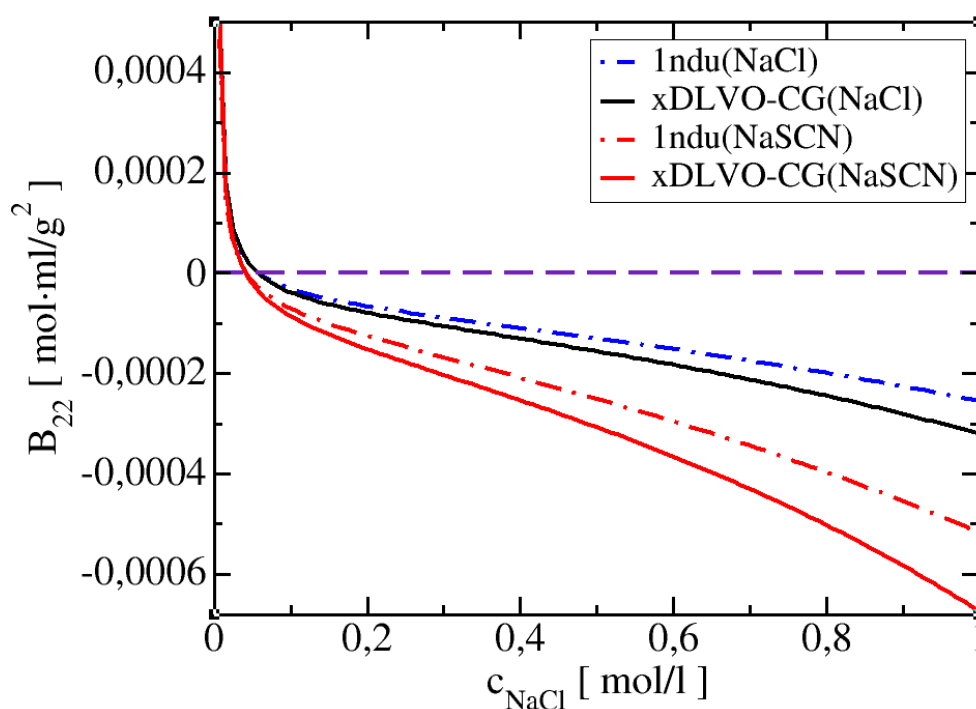

### IgG1, pH 6.5 NaCl

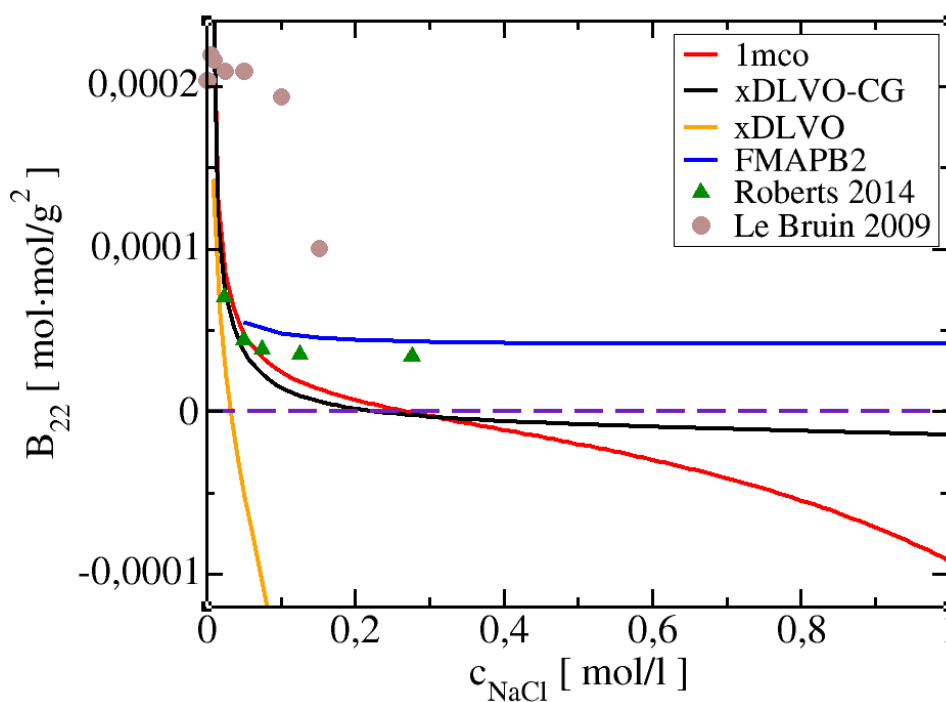

**Figure S5.** Change of the  $B_{22}$  coefficients with the change of salt concentration for Subs at pH 7 and b) IgG1 at pH 6.5 in NaCl.

### PMF, pH 7 (0.01 M NaCl)

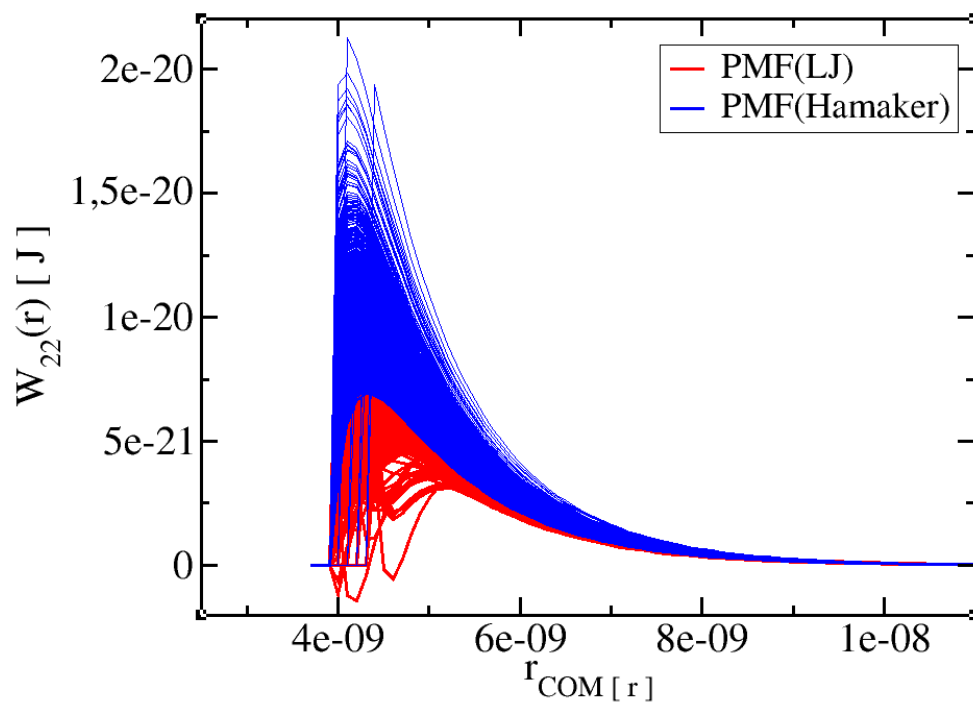

### PMF, pH 7 (1 M NaCl)

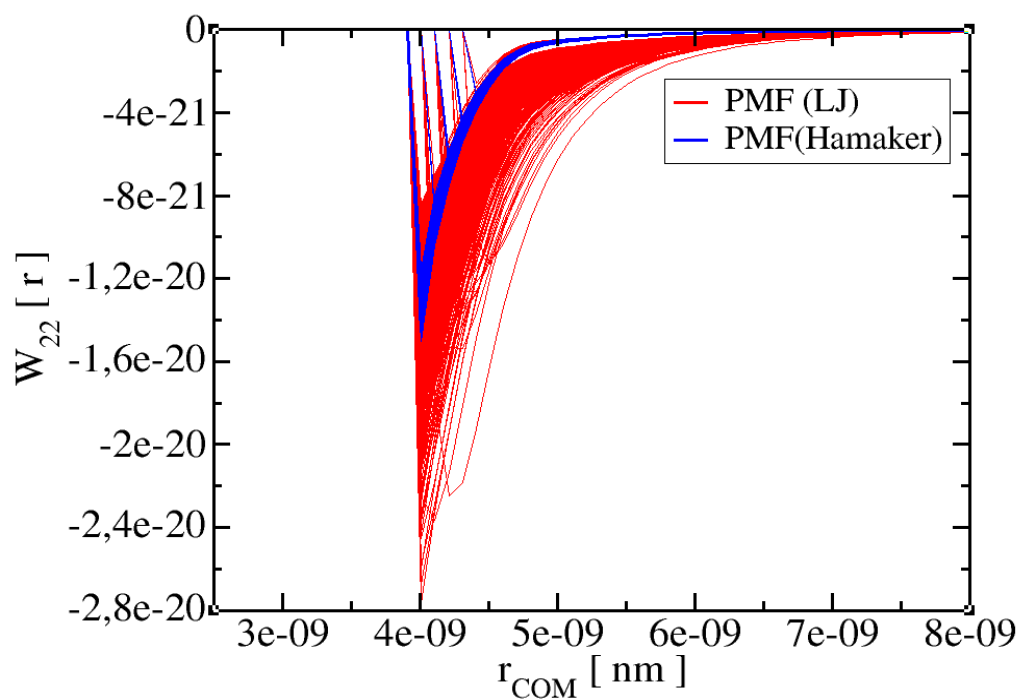

**Figure S6.** Comparison of PMF obtained from 1328 starting structures during PPI sampling protocol for LYZ at pH 7 at 0.01 M and 1 M NaCl.



### BSA, pH 7.4 NaCl

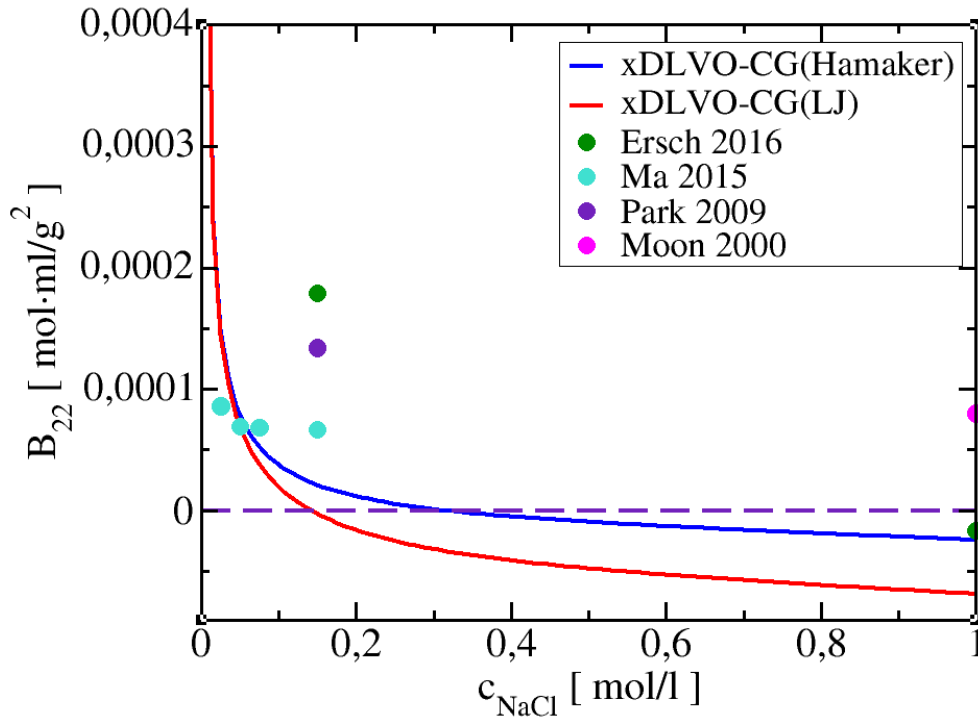

### IgG1, pH 6.5 NaCl

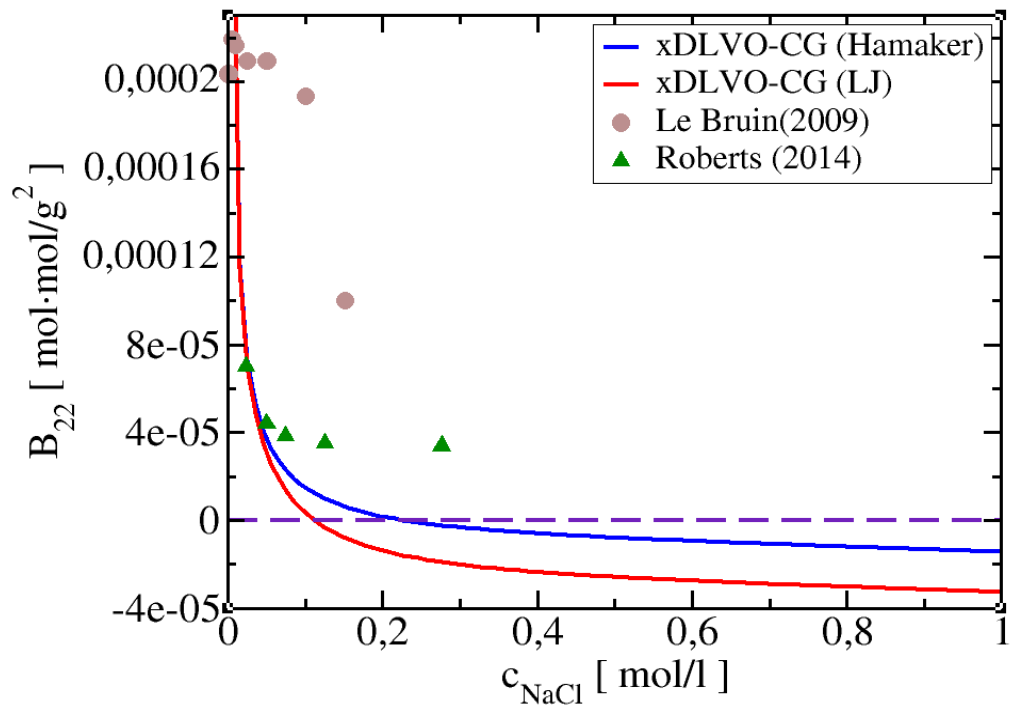

**Figure S7.** Comparison of the calculated  $B_{22}$  coefficients with Hamaker and Lennard-Jones dispersion potential type for a) BSA at pH 7.4 and b) IgG1 at pH 6.5 in NaCl.

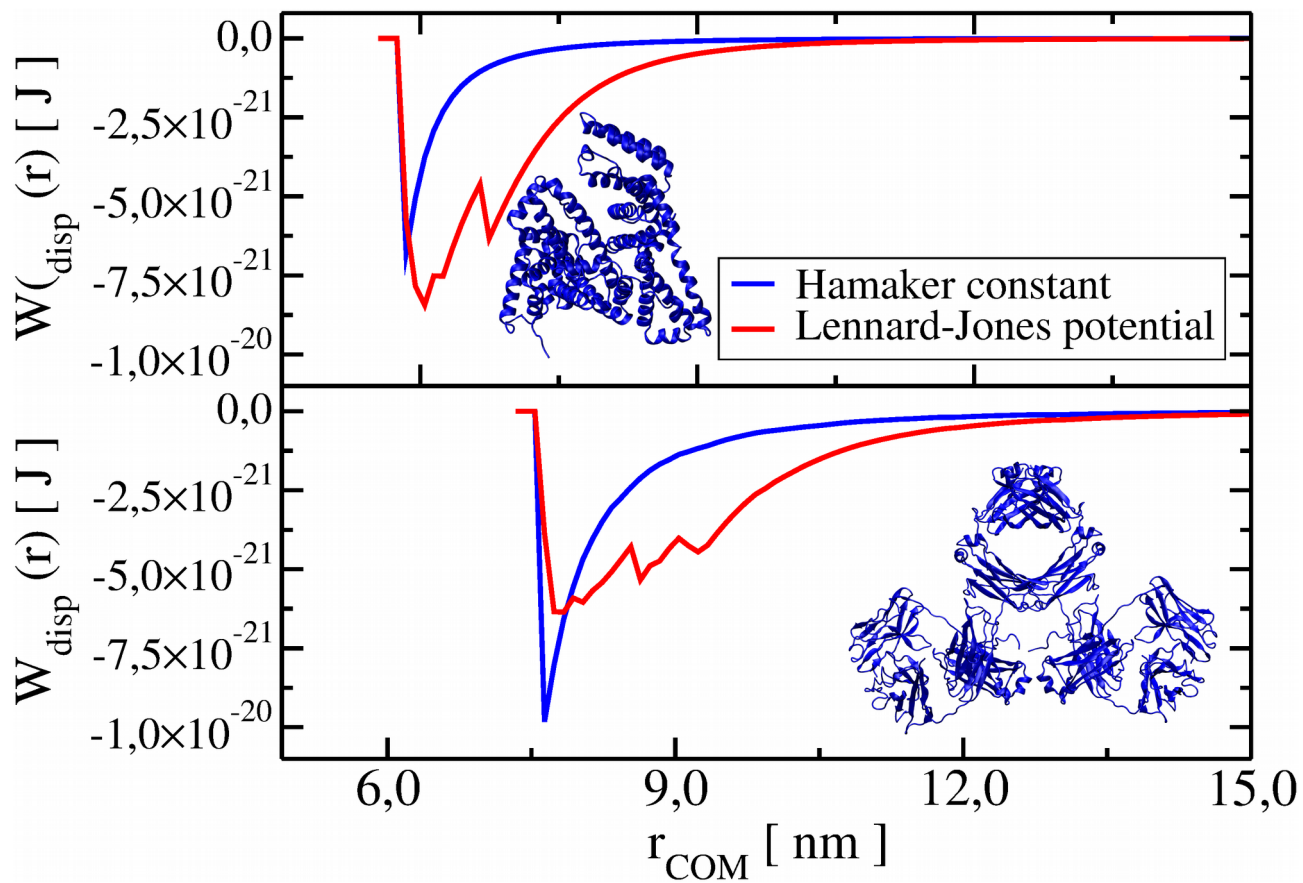

**Figure S8.** Comparison of the dispersion potential using Hamaker constant and Lennard-Jones potential for BSA (upper panel) and IgG1 (lower panel).

## References

1. Herhut, M., Brandenbusch, C. & Sadowski, G. Modeling and prediction of protein solubility using the second osmotic virial coefficient. *Fluid Phase Equilibria* **422**, 32–42 (2016).
2. Li, H., Robertson, A. D. & Jensen, J. H. Very fast empirical prediction and rationalization of protein pKa values. *Proteins Struct. Funct. Bioinforma.* **61**, 704–721 (2005).
3. Søndergaard, C. R., Olsson, M. H. M., Rostkowski, M. & Jensen, J. H. Improved Treatment of Ligands and Coupling Effects in Empirical Calculation and Rationalization of p  $K_a$  Values. *J. Chem. Theory Comput.* **7**, 2284–2295 (2011).
4. Cherstvy, A. G. & Winkler, R. G., Polyelectrolyte Adsorption onto Oppositely Charged Interfaces: Image-Charge Repulsion and Surface Curvature. *J. Phys. Chem. B* **116**, 9838–9845 (2012).
